# Supplementary material for: Self-assembly of poly(lauryl methacrylate)-b-poly(benzyl methacrylate) nano-objects synthesised by ATRP and their temperature-responsive dispersion properties
Source: Royal Society of Chemistry journal article supplement (doi:10.1039/c6sm02656g), 2017-01-01
Supplement: c6sm02656g1.pdf [file c6sm02656g1.pdf]

## SUPPORTING INFORMATION:

# Self-assembly of poly(lauryl methacrylate)-*b*-poly(benzyl methacrylate) nano-objects synthesised by ATRP and their temperature-responsive dispersion properties

Melody Obeng<sup>a</sup>, Amir H. Milani<sup>a</sup>, Muhamad S. Musa<sup>a</sup> Zhengxing Cui<sup>a</sup>, Lee A. Fielding<sup>a,\*</sup>,  
Louise Farrand<sup>b</sup>, Mark Goulding<sup>b</sup>, Brian R. Saunders<sup>a,\*</sup>

<sup>a</sup>School of Materials, The University of Manchester, Manchester, M13 9PL, UK

<sup>b</sup>Merck Chemicals Ltd, Chilworth Technical Centre, University Parkway, Southampton,  
SO16 7QD, UK

### Calculation of macroinitiator and copolymer compositions from <sup>1</sup>H NMR data

The structure for the macroinitiator used is shown in Fig. S1. The macroinitiator is abbreviated as L<sub>x</sub> for the purposes of the following calculation. Equation S1 was used to calculate the degree of polymerisation (*x*).

$$x = \frac{1}{6} \left( \left( \frac{A_h + A_c}{A_a} \right) - 2 \right) \quad (\text{S1})$$

For the above equations *A<sub>h</sub>*, *A<sub>c</sub>* and *A<sub>a</sub>* are the integrals of the signals from the **h**, **c** and **a** protons, respectively.

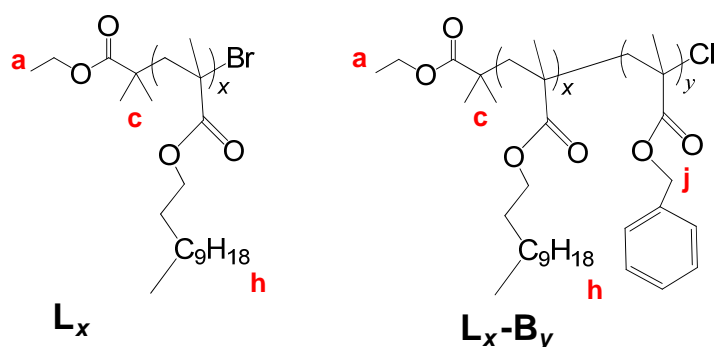

**Fig. S1.** Structures and assignments for calculating *x* and *y* for the macroinitiator and diblock copolymers used in this study.

The following equation was used to determine the number of BzMA repeat units (*y*) in the L<sub>x</sub>-B<sub>y</sub> copolymers (Fig. S1) using the <sup>1</sup>H NMR data shown in Fig. 1.

$$y = (9x + 3) \left( \frac{A_j}{A_h + A_c} \right) \quad (\text{S2})$$

For equation (S2),  $A_j$  is the integral of the signal from the  $j$  protons and a value for  $x$  of 14.0 was used.

### Calculation of $N_{agg}$ and average separation between PLMA chains at the sphere surface

To calculate the aggregation number ( $N_{agg}$ ) from the number-average diameter of the spheres determined from TEM ( $d_{TEM}$ ) it was assumed that the latter corresponded to pure PBzMA without residual solvent. The latter assumption is supported by the literature<sup>1</sup>. The procedure involved calculating the mass of one PBzMA chain ( $m_{PBzMA}$ ) and also the mass of an average sphere ( $m_{sphere}$ ). These two values were then used to calculate  $N_{agg}$ . The value for  $m_{PBzMA}$  was calculated using

$$m_{PBzMA} = \frac{MW_{PBzMA}}{N_A} \quad (\text{S3})$$

where  $MW_{PBzMA}$  is molecular weight of the PBzMA segment ( $34 \times 176 \text{ g/mol} = 5984 \text{ g/mol}$ ) and  $N_A$  is Avogadro's number. These values gave  $m_{PBzMA} = 1.0 \times 10^{-20} \text{ g}$ . The value for  $m_{sphere}$  was calculated using

$$m_{sphere} = \frac{\pi \rho_{PBzMA} d_{TEM}^3}{6} \quad (\text{S4})$$

where  $\rho_{PBzMA}$  is the density of PBzMA. The latter was taken as<sup>2</sup>  $1.18 \text{ g/cm}^3$ . Using  $d_{TEM} = 20.5 \text{ nm}$  a value of  $m_{sphere} = 5.3 \times 10^{-18} \text{ g}$  was calculated. These data enabled the value for  $N_{agg}$  ( $= m_{sphere} / m_{PBzMA}$ ) to be calculated as 530.

The average separation of chains at the sphere surface was estimated using  $N_{agg}$  and the average surface area of the spheres ( $A_{sphere}$ ). A value of  $1.3 \times 10^{-15} \text{ m}^2$  for the latter was calculated using  $A_{sphere} = \pi d_{TEM}^2$ . The area per chain at the surface ( $A_{chain}$ ) was then determined using  $A_{chain} = (A_{sphere} / N_{agg}) = 2.5 \text{ nm}^2$ . The average separation between the chains at the surface would be  $\sim 1.6 \text{ nm}$  assuming a cubic lattice at the surface.

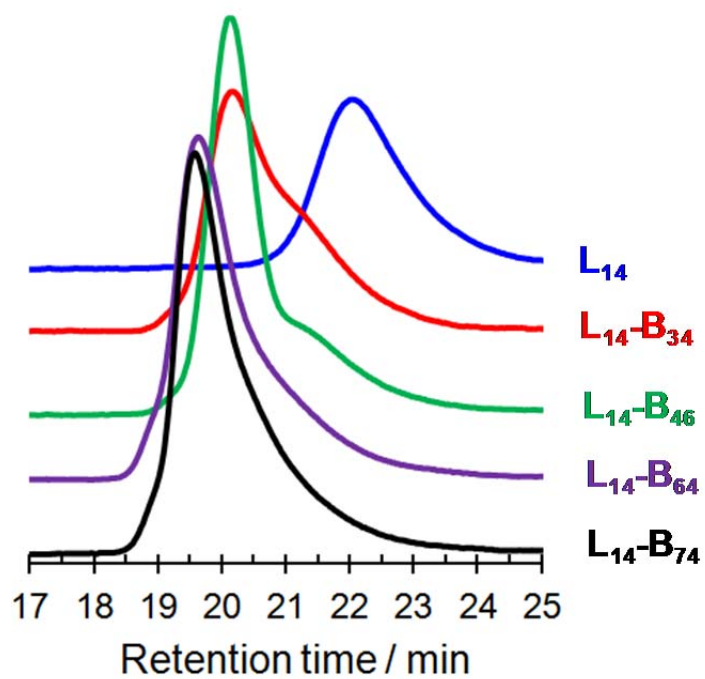

**Fig. S2** GPC chromatograms for the macroinitiator ( $L_{14}$ ) and the diblock copolymers ( $L_{14}-B_{34}$  –  $L_{14}-B_{74}$ ). The chromatograms were obtained using THF eluent and polystyrene standards.

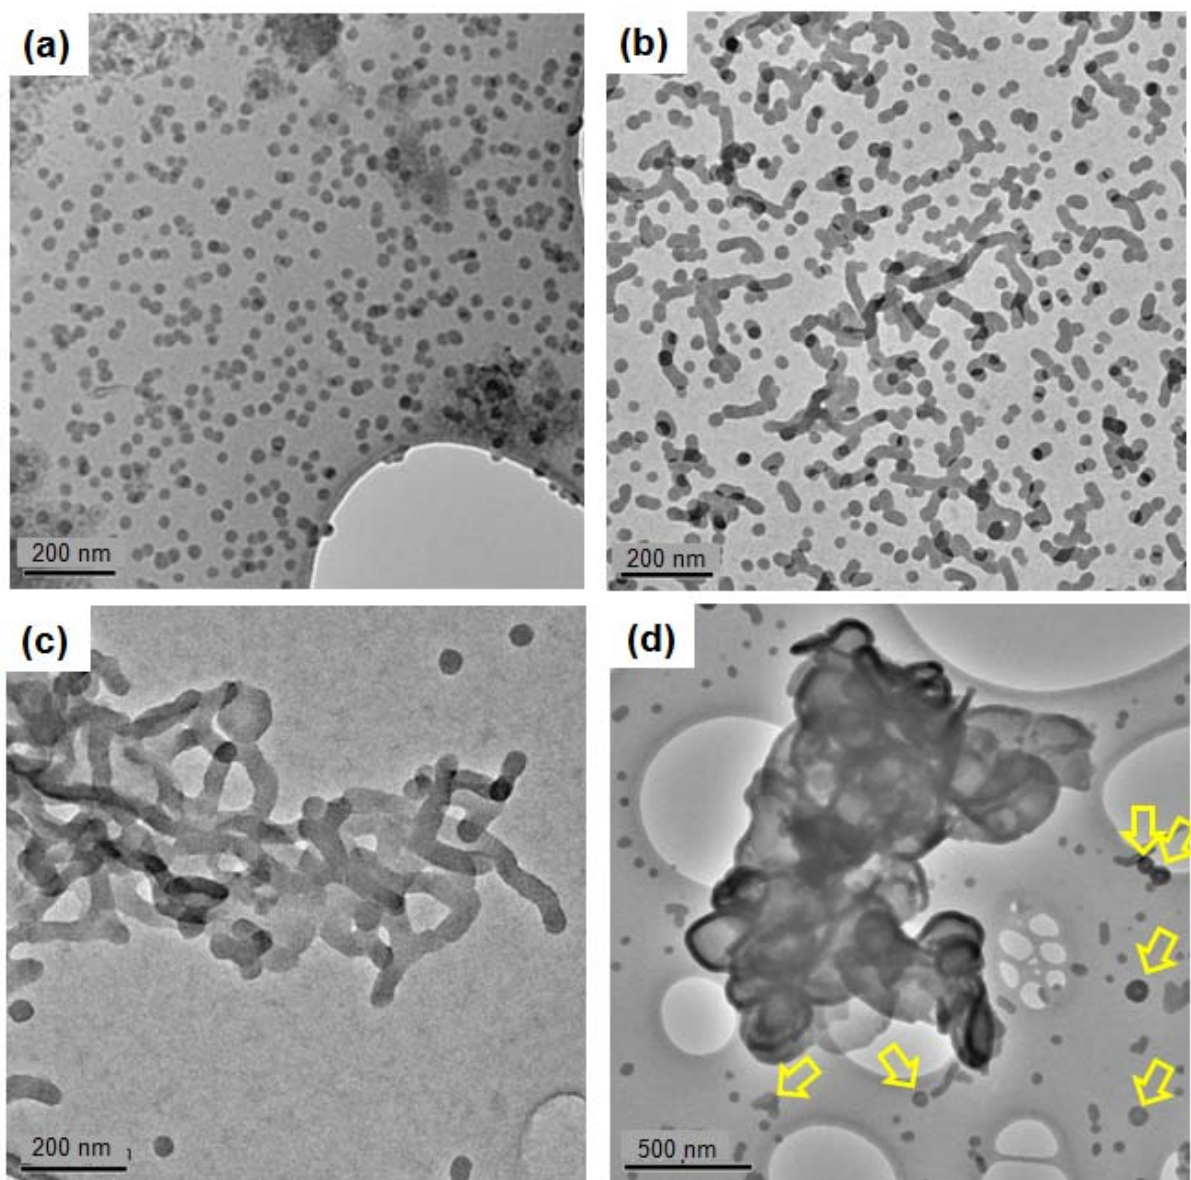

**Fig. S3** Low magnification TEM images of diblock copolymer nano-objects deposited from *n*-dodecane dispersions containing (a) L<sub>14</sub>-B<sub>34</sub>, (b) L<sub>14</sub>-B<sub>46</sub>, (c) L<sub>14</sub>-B<sub>64</sub> and (d) L<sub>14</sub>-B<sub>74</sub>. The samples were stained with ruthenium tetra-oxide. The arrows in (d) highlight small vesicles.

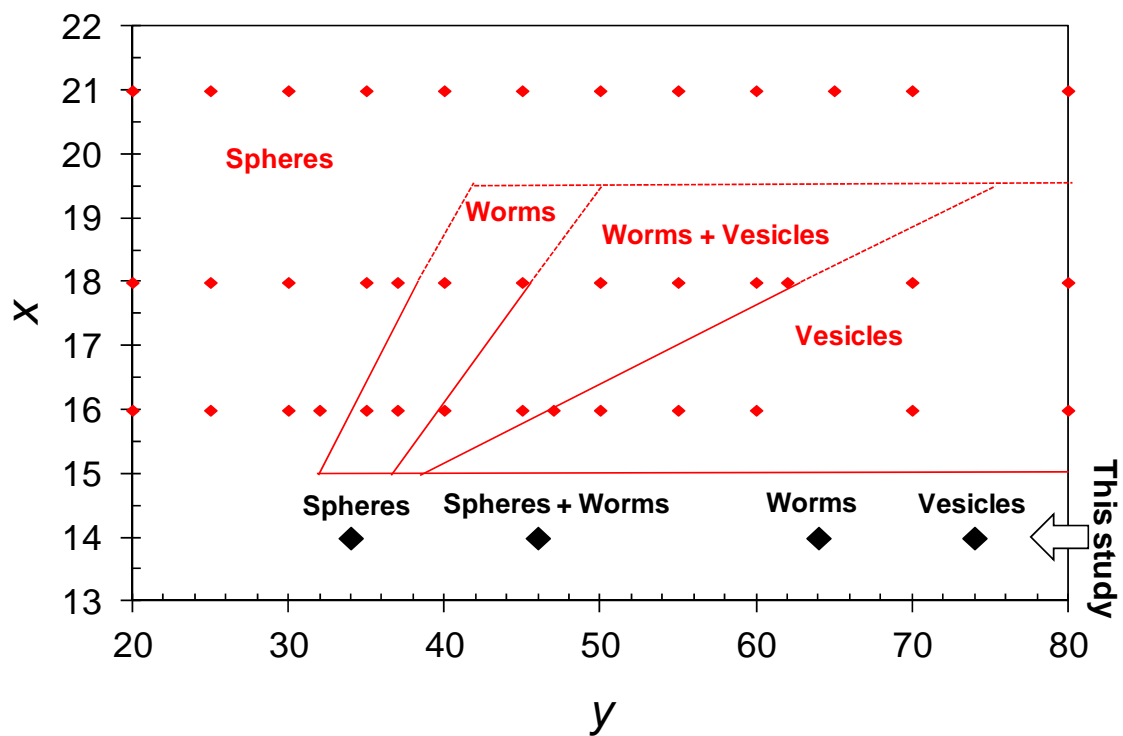

**Fig. S4** Phase diagram comparing ATRP-based  $PLMA_x$ - $PBzMA_y$  diblock copolymer nano-objects from the present study (black diamonds and labels) with those prepared by non-aqueous RAFT dispersion polymerisation from Ref. 3 (red diamonds and labels).

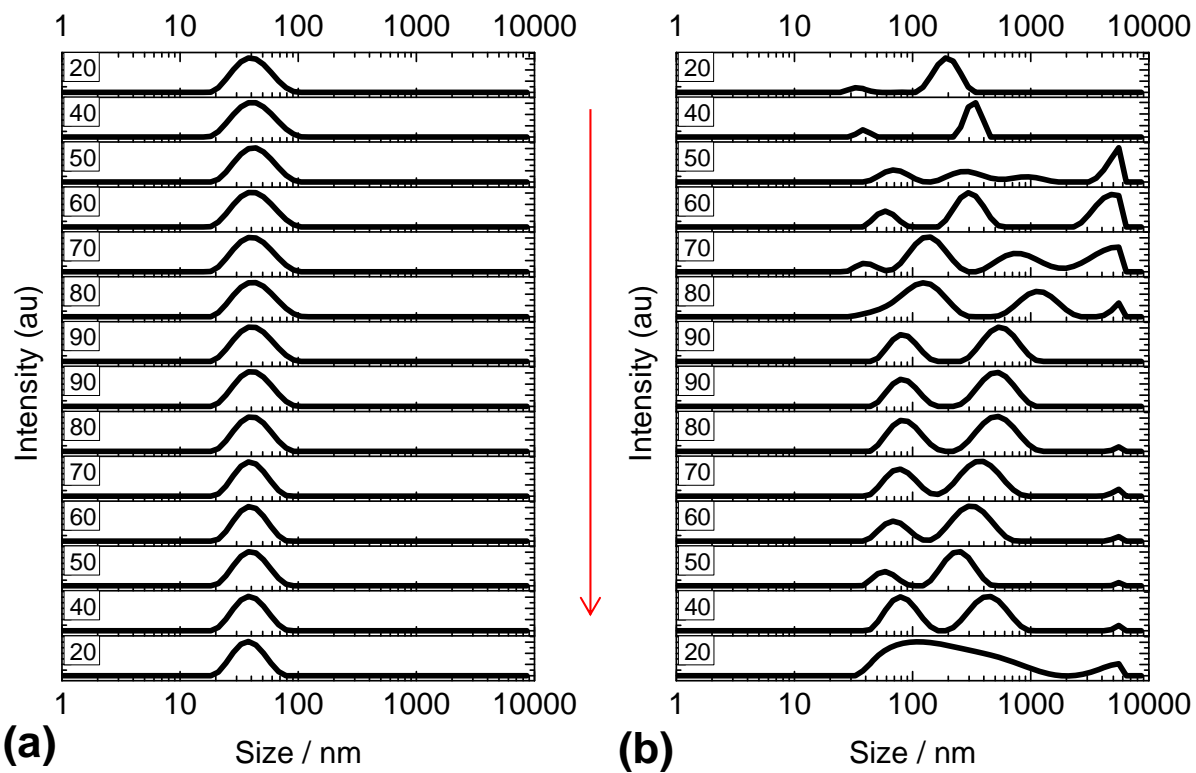

**Fig. S5** Dynamic light scattering size distributions for (a) L<sub>14</sub>-B<sub>34</sub> spheres and (b) L<sub>14</sub>-B<sub>64</sub> worms. The temperatures are shown (°C). The direction of the temperature ramp is shown with the arrow. The  $d_z$  and PDI data are shown in Fig. 4.

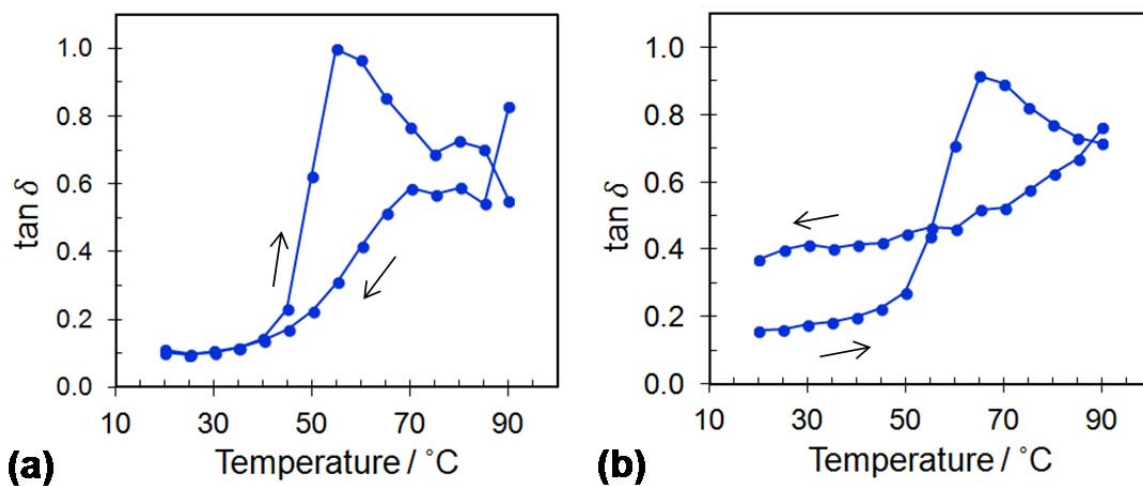

**Fig. S6.** Variation of  $\tan \delta$  ( $= G'' / G'$ , where  $G''$  and  $G'$  are the loss and storage modulus, respectively) with temperature for (a)  $L_{14}$ - $B_{46}$  and (b)  $L_{14}$ - $B_{64}$  dispersed in *n*-dodecane (20 % w/w). The measurements started at 20 °C.

## References

1. M. J. Derry, L. A. Fielding, N. J. Warren, C. J. Mable, A. J. Smith, O. O. Mykhaylyk, and S. P. Armes. *Chem Sci* 2016.
2. [www.sigmaaldrich.com](http://www.sigmaaldrich.com) Accessed November 2, 2016.
3. L. A. Fielding, J. A. Lane, M. J. Derry, O. O. Mykhaylyk, and S. P. Armes. *J Am Chem Soc* 2014, **136**, 5790-5798.
